# Supplementary material
Source: PubMed Central journal article supplement (PMC5909693)
Supplement: NIHMS907728-supplement.pdf [file NIHMS907728-supplement.pdf]

Supplementary Information for:

**Enhancing structure prediction and design of soluble and membrane proteins with explicit solvent-protein interactions**

**Jason K. Lai**<sup>1,§</sup>, **Joaquin Ambia**<sup>1,†,§</sup>, **Yumeng Wang**<sup>3</sup>, & **Patrick Barth**<sup>1,2,3,¶,&</sup>

<sup>1</sup> Department of Pharmacology, Baylor College of Medicine, One Baylor Plaza, Houston, TX 77030, USA.

<sup>2</sup> Verna and Marrs McLean Department of Biochemistry and Molecular Biology, Baylor College of Medicine, One Baylor Plaza, Houston, TX 77030, USA.

<sup>3</sup> Structural and Computational Biology and Molecular Biophysics Graduate Program, Baylor College of Medicine, One Baylor Plaza, Houston, TX 77030, USA.

<sup>†</sup> Present address: Center for Petroleum and Geosystems Engineering, Cockrell School of Engineering, The University of Texas at Austin, Austin, TX 78712, USA.

<sup>§</sup> The authors contributed equally to the study.

<sup>¶</sup> Correspondence: P.B. ([patrickb@bcm.edu](mailto:patrickb@bcm.edu))

<sup>&</sup> Present address: Interfaculty Institute of Bioengineering, School of Life Sciences, Ecole Polytechnique Federale de Lausanne, CH-1015 Lausanne, Switzerland

**Figure S1**

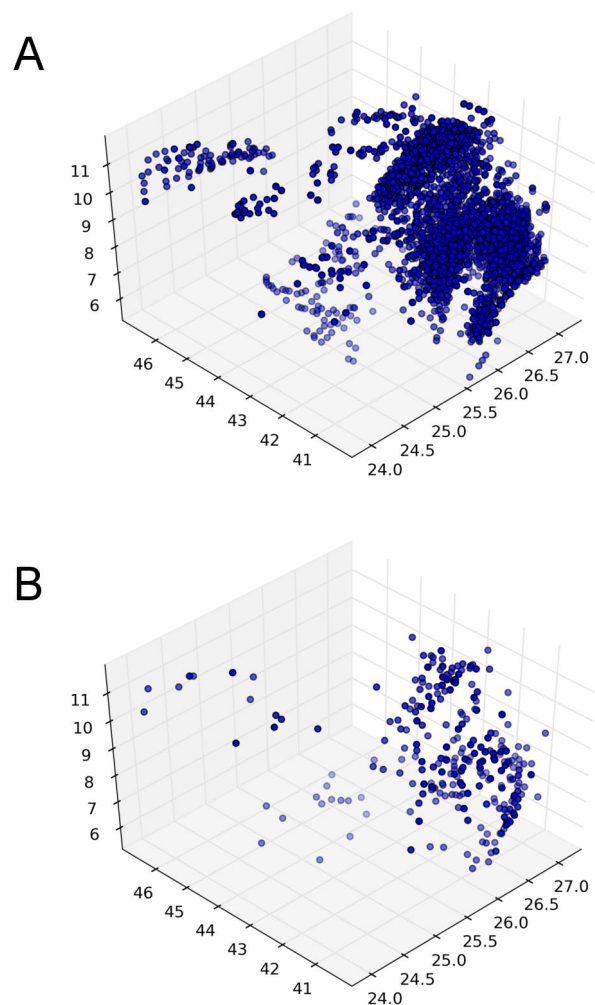

**Figure S1. Distribution of a water molecule rotamer set on an XYZ coordinate plot after a 30-fold size reduction, Related to STAR Methods text.** The generated water rotamer sets are shown (A) before and (B) after the rotamer filtering process (**methods**). The space coverage of the pre-filtered rotamer set contains nearly 15,000 rotamers (A) while the post-filtered rotamer set contains 500 (B).

Figure S2

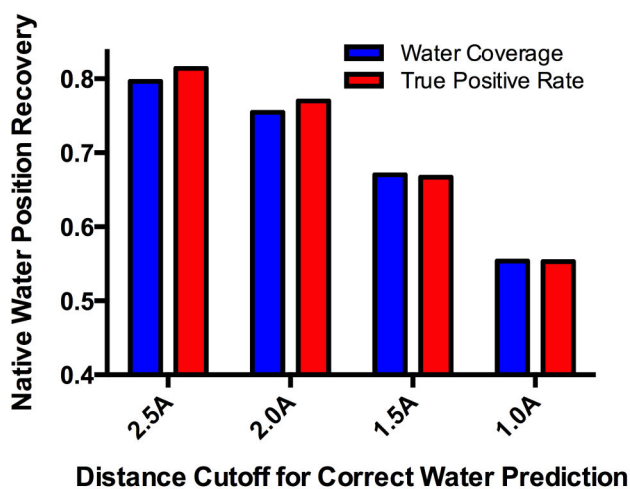

**Figure S2. SPaDES prediction of protein-bound waters positions with varying levels of stringency, Related to Figure 2.** (A) Recovery of experimentally-observed water molecules (blue) and true positive rates of predicted water molecules (red) are shown at distance cutoff of 2.5 Å, 2.0 Å, 1.5 Å, and 1.0 Å between predicted and experimentally-resolved waters. Higher fractional rates, ranging from zero to one, indicate increased accuracy of the predictions.

Figure S3

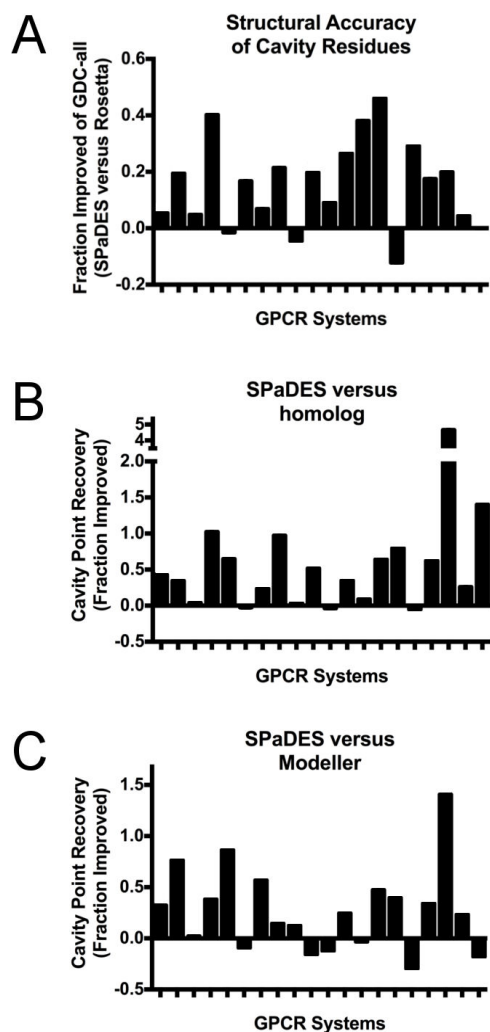

**Figure S3. High-resolution prediction of solvated transmembrane regions in G protein-coupled receptor homology models, Related to Figure 5.** (A) Improved all-atom structure prediction of local regions around buried cavities (3 Å) (measured by fraction improved of GDC-all) using SPaDES. Comparison between models generated using RosettaMembrane implemented with the hybrid solvation model of SPaDES and RosettaMembrane implemented with an implicit solvation model. (B-C) Improved structure prediction of buried cavities in GPCRs modeled using RosettaMembrane implemented with the hybrid solvation model of SPaDES compared to the starting homolog templates (B) and compared to homology models generated by Modeller (C). The structures of twenty GPCRs were modeled starting from distant homologs (sequence identity between 20 and 40%) as described in **Figure 5**. Recovery of cavity lattice points was used to determine the fraction improvement of hybrid solvation predictions over template and Modeller.

**Figure S4**

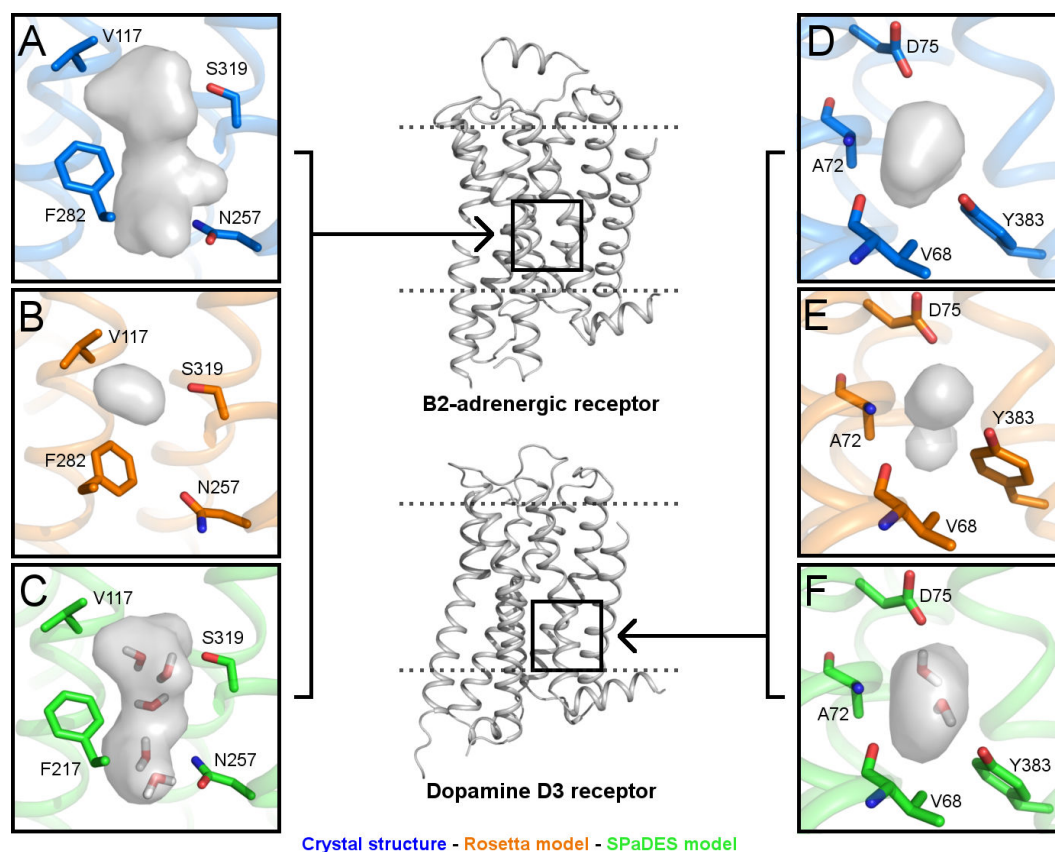

**Figure S4. Accurate prediction of hydrated cavities in GPCRs using SPaDES, Related to Figure 5.** (A-C) Beta 2 adrenergic receptor modeled from the adenosine A2a receptor. (D-F) Dopamine D3 receptor modeled from the beta 2 adrenergic receptor. These cavities are mostly lost when modeled using implicit solvation (B, E). The cavities are shown as gray surfaces, neighboring side-chains that affect the cavity shape are shown in sticks with text labels, and predicted explicit waters when using the hybrid scoring function are shown as red sticks in (C, F). Panels have been rotated to show all marked components. X-ray structures (A, D); SPaDES models (C, F).

Figure S5

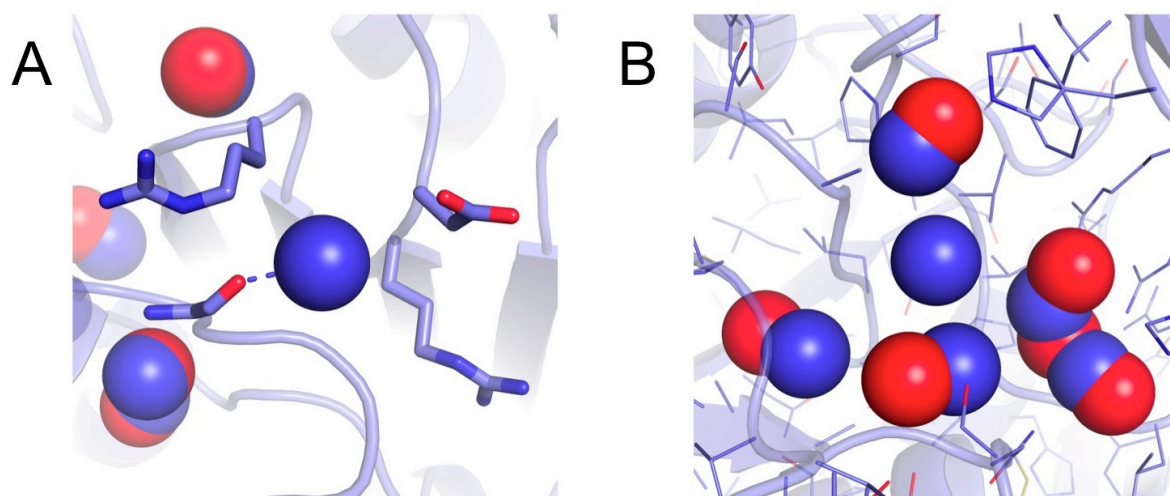

**Figure S5. SPaDES limitations in predicting the position of water molecules, Related to STAR Methods text.** (A) In the X-ray structure of the SHV-1 beta-lactamase-BLIP complex, an experimentally-observed water molecule forming only one weak polar interaction with a neighboring protein backbone carbonyl group was not recapitulated by SPaDES. (B) In the X-ray structure of the Subtilisin Calsberg-Eglin C complex, an experimentally-observed water molecule in the center of a large cavity and coordinated by surrounding water molecules was not recapitulated by SPaDES. Experimentally-observed and predicted water molecules by SPaDES are shown as blue and red spheres, respectively.

**Table S1. Water molecule position recovery at protein-protein binding interfaces using SPaDES, Fold-X with explicit water molecule modeling, and HADDOCK refinement, Related to Figure 2.** Columns 4, 5. Number of water molecules experimentally detected or predicted at the binding interface. Columns 6, 7. Water cov. (water coverage): Fraction of native water molecules recovered by a predicted water molecule within a given distance threshold (top performing of the 5 lowest energy models, standard error of mean). Columns 8, 9. T.P. (true positive): Fraction of predicted water molecules within a given distance threshold of a native water molecule (top performing of the 5 lowest energy model, standard error of mean). Standard error of mean (std. err.) is calculated from the 5 lowest energy models. \*A2AR unfolded during the HADDOCK molecular dynamics refinement and thus was not included in the analysis for HADDOCK.

| Protein-Protein Complex |                                 |                          | SPaDES: 2.5Å Distance Threshold |                |                 |                      |                 |                      |
|-------------------------|---------------------------------|--------------------------|---------------------------------|----------------|-----------------|----------------------|-----------------|----------------------|
| PDB                     | Protein 1                       | Protein 2                | # Exp. waters                   | # Pred. waters | Water cov. rate | Water cov. std. err. | T.P. water rate | T.P. water std. err. |
| 1ACB                    | Bovine alpha-chymotrypsin       | Eglin C                  | 16                              | 24             | 0.94            | 0.01                 | 0.58            | 0.02                 |
| 1BRS                    | Barnase                         | Barstar                  | 21                              | 22             | 0.86            | 0.01                 | 0.95            | 0.00                 |
| 1CSE                    | Subtilisin Carlsberg            | Eglin C                  | 26                              | 17             | 0.62            | 0.01                 | 0.94            | 0.00                 |
| 1DQJ                    | HyHEL-63 Fab                    | HEW Lysozyme             | 18                              | 24             | 0.72            | 0.03                 | 0.54            | 0.02                 |
| 1DVF                    | IgG1-kappa D1.3 Fv              | E5.2 Fv                  | 8                               | 16             | 0.63            | 0.00                 | 0.44            | 0.02                 |
| 1JTG                    | TEM-1 beta-lactamase            | BLIP                     | 38                              | 39             | 0.82            | 0.02                 | 0.90            | 0.02                 |
| 1TM1                    | Subtilisin BPN                  | Chymotrypsin inhibitor 2 | 23                              | 24             | 0.78            | 0.02                 | 0.88            | 0.03                 |
| 1XD3                    | UCH-L3                          | Ubiquitin                | 32                              | 26             | 0.75            | 0.02                 | 0.88            | 0.01                 |
| 2FTL                    | Bovine trypsin                  | BPTI                     | 22                              | 20             | 0.82            | 0.02                 | 0.85            | 0.01                 |
| 2G2U                    | SHV-1 beta-lactamase            | BLIP                     | 47                              | 50             | 0.83            | 0.03                 | 0.88            | 0.02                 |
| 2WPT                    | Colicin E2 immunity protein     | Colicin E9 Dnase         | 10                              | 12             | 1.00            | 0.00                 | 0.83            | 0.02                 |
| 3NPS                    | Membrane-type serine protease 1 | S4 Fab                   | 15                              | 12             | 0.60            | 0.01                 | 0.75            | 0.02                 |
| 4E1Y                    | A2AAR                           |                          | 35                              | 31             | 0.80            | 0.01                 | 0.97            | 0.01                 |
| 1C3W                    | Bacteriorhodopsin               |                          | 9                               | 9              | 1.00            | 0.02                 | 1.00            | 0.03                 |
| Averages:               |                                 |                          |                                 |                | 0.80            | 0.02                 | 0.81            | 0.02                 |

  

| Protein-Protein Complex |                                 |                          | SPaDES: 2Å Distance Threshold |                |                 |                      |                 |                      |
|-------------------------|---------------------------------|--------------------------|-------------------------------|----------------|-----------------|----------------------|-----------------|----------------------|
| PDB                     | Protein 1                       | Protein 2                | # Exp. waters                 | # Pred. waters | Water cov. rate | Water cov. std. err. | T.P. water rate | T.P. water std. err. |
| 1ACB                    | Bovine alpha-chymotrypsin       | Eglin C                  | 16                            | 24             | 0.88            | 0.02                 | 0.54            | 0.02                 |
| 1BRS                    | Barnase                         | Barstar                  | 21                            | 22             | 0.86            | 0.01                 | 0.95            | 0.00                 |
| 1CSE                    | Subtilisin Carlsberg            | Eglin C                  | 26                            | 17             | 0.58            | 0.00                 | 0.94            | 0.01                 |
| 1DQJ                    | HyHEL-63 Fab                    | HEW Lysozyme             | 18                            | 24             | 0.61            | 0.03                 | 0.46            | 0.02                 |
| 1DVF                    | IgG1-kappa D1.3 Fv              | E5.2 Fv                  | 8                             | 16             | 0.63            | 0.00                 | 0.44            | 0.01                 |
| 1JTG                    | TEM-1 beta-lactamase            | BLIP                     | 38                            | 39             | 0.82            | 0.02                 | 0.79            | 0.02                 |
| 1TM1                    | Subtilisin BPN                  | Chymotrypsin inhibitor 2 | 23                            | 24             | 0.74            | 0.02                 | 0.83            | 0.02                 |
| 1XD3                    | UCH-L3                          | Ubiquitin                | 32                            | 26             | 0.75            | 0.02                 | 0.88            | 0.01                 |
| 2FTL                    | Bovine trypsin                  | BPTI                     | 22                            | 20             | 0.77            | 0.01                 | 0.85            | 0.01                 |
| 2G2U                    | SHV-1 beta-lactamase            | BLIP                     | 47                            | 50             | 0.72            | 0.02                 | 0.76            | 0.02                 |
| 2WPT                    | Colicin E2 immunity protein     | Colicin E9 Dnase         | 10                            | 12             | 1.00            | 0.00                 | 0.83            | 0.02                 |
| 3NPS                    | Membrane-type serine protease 1 | S4 Fab                   | 15                            | 12             | 0.53            | 0.01                 | 0.67            | 0.02                 |
| 4E1Y                    | A2AAR                           |                          | 35                            | 31             | 0.80            | 0.01                 | 0.94            | 0.01                 |
| 1C3W                    | Bacteriorhodopsin               |                          | 9                             | 9              | 0.89            | 0.03                 | 0.89            | 0.03                 |
| Averages:               |                                 |                          |                               |                | 0.75            | 0.01                 | 0.77            | 0.02                 |



| Protein-Protein Complex |                                 |                          | SPaDES: 1.5Å Distance Threshold |                |                 |                      |                 |                      |
|-------------------------|---------------------------------|--------------------------|---------------------------------|----------------|-----------------|----------------------|-----------------|----------------------|
| PDB                     | Protein 1                       | Protein 2                | # Exp. waters                   | # Pred. waters | Water cov. rate | Water cov. std. err. | T.P. water rate | T.P. water std. err. |
| 1ACB                    | Bovine alpha-chymotrypsin       | Eglin C                  | 16                              | 24             | 0.81            | 0.03                 | 0.54            | 0.02                 |
| 1BRS                    | Barnase                         | Barstar                  | 21                              | 22             | 0.67            | 0.03                 | 0.68            | 0.04                 |
| 1CSE                    | Subtilisin Carlsberg            | Eglin C                  | 26                              | 17             | 0.58            | 0.01                 | 0.88            | 0.03                 |
| 1DQJ                    | HyHEL-63 Fab                    | HEW Lysozyme             | 18                              | 24             | 0.39            | 0.03                 | 0.29            | 0.03                 |
| 1DVF                    | IgG1-kappa D1.3 Fv              | E5.2 Fv                  | 8                               | 16             | 0.38            | 0.05                 | 0.19            | 0.03                 |
| 1JTG                    | TEM-1 beta-lactamase            | BLIP                     | 38                              | 39             | 0.74            | 0.01                 | 0.69            | 0.01                 |
| 1TM1                    | Subtilisin BPN                  | Chymotrypsin inhibitor 2 | 23                              | 24             | 0.70            | 0.03                 | 0.67            | 0.02                 |
| 1XD3                    | UCH-L3                          | Ubiquitin                | 32                              | 26             | 0.69            | 0.01                 | 0.85            | 0.02                 |
| 2FTL                    | Bovine trypsin                  | BPTI                     | 22                              | 20             | 0.77            | 0.02                 | 0.85            | 0.02                 |
| 2G2U                    | SHV-1 beta-lactamase            | BLIP                     | 47                              | 50             | 0.70            | 0.03                 | 0.66            | 0.02                 |
| 2WPT                    | Colicin E2 immunity protein     | Colicin E9 Dnase         | 10                              | 12             | 1.00            | 0.02                 | 0.83            | 0.03                 |
| 3NPS                    | Membrane-type serine protease 1 | S4 Fab                   | 15                              | 12             | 0.53            | 0.01                 | 0.67            | 0.02                 |
| 4E1Y                    | A2AAR                           |                          | 35                              | 31             | 0.77            | 0.01                 | 0.87            | 0.01                 |
| 1C3W                    | Bacteriorhodopsin               |                          | 9                               | 9              | 0.67            | 0.03                 | 0.67            | 0.03                 |
| Averages:               |                                 |                          |                                 |                | 0.67            | 0.02                 | 0.67            | 0.02                 |

  

| Protein-Protein Complex |                                 |                          | SPaDes: 1Å Distance Threshold |                |                 |                      |                 |                      |
|-------------------------|---------------------------------|--------------------------|-------------------------------|----------------|-----------------|----------------------|-----------------|----------------------|
| PDB                     | Protein 1                       | Protein 2                | # Exp. waters                 | # Pred. waters | Water cov. rate | Water cov. std. err. | T.P. water rate | T.P. water std. err. |
| 1ACB                    | Bovine alpha-chymotrypsin       | Eglin C                  | 16                            | 24             | 0.69            | 0.03                 | 0.46            | 0.02                 |
| 1BRS                    | Barnase                         | Barstar                  | 21                            | 22             | 0.48            | 0.04                 | 0.45            | 0.05                 |
| 1CSE                    | Subtilisin Carlsberg            | Eglin C                  | 26                            | 17             | 0.46            | 0.01                 | 0.71            | 0.03                 |
| 1DQJ                    | HyHEL-63 Fab                    | HEW Lysozyme             | 18                            | 24             | 0.28            | 0.02                 | 0.21            | 0.02                 |
| 1DVF                    | IgG1-kappa D1.3 Fv              | E5.2 Fv                  | 8                             | 16             | 0.25            | 0.05                 | 0.13            | 0.03                 |
| 1JTG                    | TEM-1 beta-lactamase            | BLIP                     | 38                            | 39             | 0.58            | 0.03                 | 0.56            | 0.02                 |
| 1TM1                    | Subtilisin BPN                  | Chymotrypsin inhibitor 2 | 23                            | 24             | 0.52            | 0.01                 | 0.50            | 0.03                 |
| 1XD3                    | UCH-L3                          | Ubiquitin                | 32                            | 26             | 0.53            | 0.01                 | 0.65            | 0.01                 |
| 2FTL                    | Bovine trypsin                  | BPTI                     | 22                            | 20             | 0.73            | 0.02                 | 0.80            | 0.03                 |
| 2G2U                    | SHV-1 beta-lactamase            | BLIP                     | 47                            | 50             | 0.60            | 0.04                 | 0.56            | 0.03                 |
| 2WPT                    | Colicin E2 immunity protein     | Colicin E9 Dnase         | 10                            | 12             | 0.90            | 0.02                 | 0.75            | 0.02                 |
| 3NPS                    | Membrane-type serine protease 1 | S4 Fab                   | 15                            | 12             | 0.53            | 0.02                 | 0.67            | 0.02                 |
| 4E1Y                    | A2AAR                           |                          | 35                            | 31             | 0.66            | 0.03                 | 0.74            | 0.04                 |
| 1C3W                    | Bacteriorhodopsin               |                          | 9                             | 9              | 0.56            | 0.04                 | 0.56            | 0.04                 |
| Averages:               |                                 |                          |                               |                | 0.55            | 0.03                 | 0.55            | 0.03                 |

| Protein-Protein Complex |                                 |                          | Fold-X: 2Å Distance Threshold |                |                 |                      |                 |                      |
|-------------------------|---------------------------------|--------------------------|-------------------------------|----------------|-----------------|----------------------|-----------------|----------------------|
| PDB                     | Protein 1                       | Protein 2                | # Exp. waters                 | # Pred. waters | Water cov. rate | Water cov. std. err. | T.P. water rate | T.P. water std. err. |
| 1ACB                    | Bovine alpha-chymotrypsin       | Eglin C                  | 16                            | 41             | 0.81            | -                    | 0.39            | -                    |
| 1BRS                    | Barnase                         | Barstar                  | 21                            | 26             | 0.81            | -                    | 0.69            | -                    |
| 1CSE                    | Subtilisin Carlsberg            | Eglin C                  | 26                            | 25             | 0.58            | -                    | 0.56            | -                    |
| 1DQJ                    | HyHEL-63 Fab                    | HEW Lysozyme             | 18                            | 39             | 0.67            | -                    | 0.33            | -                    |
| 1DVF                    | IgG1-kappa D1.3 Fv              | E5.2 Fv                  | 8                             | 28             | 0.50            | -                    | 0.14            | -                    |
| 1JTG                    | TEM-1 beta-lactamase            | BLIP                     | 38                            | 64             | 0.61            | -                    | 0.36            | -                    |
| 1TM1                    | Subtilisin BPN                  | Chymotrypsin inhibitor 2 | 23                            | 37             | 0.70            | -                    | 0.51            | -                    |
| 1XD3                    | UCH-L3                          | Ubiquitin                | 32                            | 44             | 0.56            | -                    | 0.48            | -                    |
| 2FTL                    | Bovine trypsin                  | BPTI                     | 22                            | 41             | 0.68            | -                    | 0.44            | -                    |
| 2G2U                    | SHV-1 beta-lactamase            | BLIP                     | 47                            | 62             | 0.60            | -                    | 0.47            | -                    |
| 2WPT                    | Colicin E2 immunity protein     | Colicin E9 Dnase         | 10                            | 33             | 1.00            | -                    | 0.39            | -                    |
| 3NPS                    | Membrane-type serine protease 1 | S4 Fab                   | 15                            | 29             | 0.67            | -                    | 0.34            | -                    |
| 4E1Y                    | A2AAR                           |                          | 35                            | 34             | 0.60            | -                    | 0.65            | -                    |
| 1C3W                    | Bacteriorhodopsin               |                          | 9                             | 16             | 0.78            | -                    | 0.44            | -                    |
| Averages:               |                                 |                          |                               |                | 0.67            | -                    | 0.44            | -                    |

  

| Protein-Protein Complex |                                 |                          | HADDOCK: 2Å Distance Threshold |                |                 |                      |                 |                      |
|-------------------------|---------------------------------|--------------------------|--------------------------------|----------------|-----------------|----------------------|-----------------|----------------------|
| PDB                     | Protein 1                       | Protein 2                | # Exp. waters                  | # Pred. waters | Water cov. rate | Water cov. std. err. | T.P. water rate | T.P. water std. err. |
| 1ACB                    | Bovine alpha-chymotrypsin       | Eglin C                  | 16                             | 20             | 0.56            | 0.02                 | 0.45            | 0.04                 |
| 1BRS                    | Barnase                         | Barstar                  | 21                             | 14             | 0.52            | 0.01                 | 0.79            | 0.02                 |
| 1CSE                    | Subtilisin Carlsberg            | Eglin C                  | 26                             | 14             | 0.38            | 0.00                 | 0.71            | 0.03                 |
| 1DQJ                    | HyHEL-63 Fab                    | HEW Lysozyme             | 18                             | 20             | 0.44            | 0.03                 | 0.40            | 0.04                 |
| 1DVF                    | IgG1-kappa D1.3 Fv              | E5.2 Fv                  | 8                              | 23             | 0.75            | 0.00                 | 0.30            | 0.03                 |
| 1JTG                    | TEM-1 beta-lactamase            | BLIP                     | 38                             | 36             | 0.53            | 0.02                 | 0.53            | 0.04                 |
| 1TM1                    | Subtilisin BPN                  | Chymotrypsin inhibitor 2 | 23                             | 13             | 0.52            | 0.02                 | 0.85            | 0.04                 |
| 1XD3                    | UCH-L3                          | Ubiquitin                | 32                             | 26             | 0.59            | 0.02                 | 0.65            | 0.04                 |
| 2FTL                    | Bovine trypsin                  | BPTI                     | 22                             | 19             | 0.36            | 0.02                 | 0.42            | 0.03                 |
| 2G2U                    | SHV-1 beta-lactamase            | BLIP                     | 47                             | 48             | 0.51            | 0.02                 | 0.46            | 0.04                 |
| 2WPT                    | Colicin E2 immunity protein     | Colicin E9 Dnase         | 10                             | 9              | 0.50            | 0.00                 | 0.56            | 0.04                 |
| 3NPS                    | Membrane-type serine protease 1 | S4 Fab                   | 15                             | 16             | 0.53            | 0.02                 | 0.50            | 0.04                 |
| 1C3W                    | Bacteriorhodopsin               |                          | 9                              | 4              | 0.33            | 0.03                 | 0.75            | 0.05                 |
| Averages:               |                                 |                          |                                |                | 0.50            | 0.02                 | 0.57            | 0.04                 |

**Table S2. Side-chain rotamer recovery at protein-protein binding interfaces, Related to Figure 3.** Recoveries are reported for Rosetta, SPaDES, Fold-X with implicit solvation and Fold-X with explicit water molecule modeling for two benchmarks: high-resolution hydrated and low- and high-resolution sets (**methods**). Standard error of mean (std. error) is calculated from the 5 lowest energy models for Rosetta and SPaDES.

| High-Resolution Hydrated Set        |                                |                  |                                 |                     |                                |                  |                                 |                     |
|-------------------------------------|--------------------------------|------------------|---------------------------------|---------------------|--------------------------------|------------------|---------------------------------|---------------------|
|                                     | Rosetta                        |                  |                                 |                     | SPaDES                         |                  |                                 |                     |
|                                     | # Correctly predicted rotamers | # Total rotamers | Fraction of correctly predicted | Fraction Std. Error | # Correctly predicted rotamers | # Total rotamers | Fraction of correctly predicted | Fraction Std. Error |
| Polar and charged sidechains        | 86                             | 119              | 0.72                            | 0.00                | 95                             | 119              | 0.80                            | 0.02                |
| Hydrophobic sidechains              | 14                             | 16               | 0.88                            | 0.00                | 14                             | 16               | 0.88                            | 0.00                |
| Complexes with <20 interface waters | 31                             | 49               | 0.63                            | 0.00                | 34                             | 49               | 0.69                            | 0.01                |
| Complexes with >20 interface waters | 69                             | 86               | 0.80                            | 0.00                | 75                             | 86               | 0.87                            | 0.01                |
| All benchmark sidechains            | 100                            | 135              | 0.74                            | 0.00                | 109                            | 135              | 0.81                            | 0.02                |
| Fold-X (implicit)                   |                                |                  |                                 |                     |                                |                  |                                 |                     |
|                                     | Fold-X                         |                  |                                 |                     | Fold-X                         |                  |                                 |                     |
|                                     | # Correctly predicted rotamers | # Total rotamers | Fraction of correctly predicted | Fraction Std. Error | # Correctly predicted rotamers | # Total rotamers | Fraction of correctly predicted | Fraction Std. Error |
| Polar and charged sidechains        | 68                             | 119              | 0.57                            | -                   | 78                             | 119              | 0.66                            | -                   |
| Hydrophobic sidechains              | 14                             | 16               | 0.88                            | -                   | 14                             | 16               | 0.88                            | -                   |
| Complexes with <20 interface waters | 25                             | 49               | 0.51                            | -                   | 29                             | 49               | 0.59                            | -                   |
| Complexes with >20 interface waters | 57                             | 86               | 0.66                            | -                   | 63                             | 86               | 0.73                            | -                   |
| All benchmark sidechains            | 82                             | 135              | 0.61                            | -                   | 92                             | 135              | 0.68                            | -                   |
| Low- and High-Resolution Set        |                                |                  |                                 |                     |                                |                  |                                 |                     |
|                                     | Rosetta                        |                  |                                 |                     | SPaDES                         |                  |                                 |                     |
|                                     | # Correctly predicted rotamers | # Total rotamers | Fraction of correctly predicted | Fraction Std. Error | # Correctly predicted rotamers | # Total rotamers | Fraction of correctly predicted | Fraction Std. Error |
| Polar and charged sidechains        | 237                            | 352              | 0.67                            | 0.01                | 262                            | 352              | 0.74                            | 0.04                |
| Hydrophobic sidechains              | 44                             | 50               | 0.88                            | 0.00                | 44                             | 50               | 0.88                            | 0.00                |
| Complexes with <20 interface waters | 124                            | 167              | 0.74                            | 0.01                | 130                            | 167              | 0.78                            | 0.03                |
| Complexes with >20 interface waters | 157                            | 235              | 0.67                            | 0.01                | 176                            | 235              | 0.75                            | 0.02                |
| All benchmark sidechains            | 281                            | 402              | 0.70                            | 0.01                | 306                            | 402              | 0.76                            | 0.03                |
| Fold-X (implicit)                   |                                |                  |                                 |                     |                                |                  |                                 |                     |
|                                     | Fold-X                         |                  |                                 |                     | Fold-X                         |                  |                                 |                     |
|                                     | # Correctly predicted rotamers | # Total rotamers | Fraction of correctly predicted | Fraction Std. Error | # Correctly predicted rotamers | # Total rotamers | Fraction of correctly predicted | Fraction Std. Error |
| Polar and charged sidechains        | 203                            | 352              | 0.58                            | -                   | 192                            | 352              | 0.55                            | -                   |
| Hydrophobic sidechains              | 41                             | 50               | 0.82                            | -                   | 44                             | 50               | 0.88                            | -                   |
| Complexes with <20 interface waters | 105                            | 167              | 0.63                            | -                   | 107                            | 167              | 0.64                            | -                   |
| Complexes with >20 interface waters | 139                            | 235              | 0.59                            | -                   | 129                            | 235              | 0.55                            | -                   |
| All benchmark sidechains            | 244                            | 402              | 0.61                            | -                   | 236                            | 402              | 0.59                            | -                   |

**Table S3. Prediction of mutational effects on protein binding energies, Related to Figure 4.** Predictions are reported for Rosetta, SPaDES, Fold-X with implicit solvation (Fold-X implicit) and Fold-X with explicit water molecule modeling (Fold-X) for two benchmarks: a high-resolution set of protein-protein complex structures with experimentally detected water molecules at the binding interface (high-resolution hydrated set) and a complete (low- and high-resolution) set of protein-protein complex structures (**methods**). \*Fraction of predicted  $\Delta\Delta G_{\text{binding}}$  that are correctly predicted to be either stabilizing ( $<-1$  kcal.mol<sup>-1</sup>), destabilizing ( $>1$  kcal.mol<sup>-1</sup>), or neutral ( $>-1$  and  $<1$  kcal.mol<sup>-1</sup>).

| <b>Rosetta</b>                      |      |                                     |      |
|-------------------------------------|------|-------------------------------------|------|
| <b>High-Resolution Hydrated Set</b> |      | <b>Low- and High-Resolution Set</b> |      |
| # of complexes                      | 12   | # of complexes                      | 39   |
| # of mutations                      | 120  | # of mutations                      | 532  |
| R correlation coefficient           | 0.56 | R correlation coefficient           | 0.33 |
| Standard error of fit               | 2.76 | Standard error of fit               | 2.27 |
| Slope of best fit                   | 0.99 | Slope of best fit                   | 0.40 |
| Stability classification*           | 0.59 | Stability classification*           | 0.48 |
| <b>SPaDES</b>                       |      |                                     |      |
| <b>High-Resolution Hydrated Set</b> |      | <b>Low- and High-Resolution Set</b> |      |
| # of complexes                      | 12   | # of complexes                      | 39   |
| # of mutations                      | 120  | # of mutations                      | 532  |
| R correlation coefficient           | 0.72 | R correlation coefficient           | 0.60 |
| Standard error of fit               | 2.32 | Standard error of fit               | 1.93 |
| Slope of best fit                   | 0.43 | Slope of best fit                   | 0.31 |
| Stability classification*           | 0.62 | Stability classification*           | 0.55 |
| <b>Fold-X (implicit)</b>            |      |                                     |      |
| <b>High-Resolution Hydrated Set</b> |      | <b>Low- and High-Resolution Set</b> |      |
| # of complexes                      | 12   | # of complexes                      | 39   |
| # of mutations                      | 120  | # of mutations                      | 532  |
| R correlation coefficient           | 0.59 | R correlation coefficient           | 0.48 |
| Standard error of fit               | 2.69 | Standard error of fit               | 2.10 |
| Slope of best fit                   | 1.11 | Slope of best fit                   | 0.81 |
| Stability classification*           | 0.64 | Stability classification*           | 0.59 |
| <b>Fold-X</b>                       |      |                                     |      |
| <b>High-Resolution Hydrated Set</b> |      | <b>Low- and High-Resolution Set</b> |      |
| # of complexes                      | 12   | # of complexes                      | 39   |
| # of mutations                      | 120  | # of mutations                      | 532  |
| R correlation coefficient           | 0.47 | R correlation coefficient           | 0.39 |
| Standard error of fit               | 2.92 | Standard error of fit               | 2.22 |
| Slope of best fit                   | 0.90 | Slope of best fit                   | 0.63 |
| Stability classification*           | 0.60 | Stability classification*           | 0.57 |

**Table S4. Detailed energetic deconstruction of the prediction of mutational effects on protein binding energies using SPaDES, Related to Figure 4.**  $\Delta\Delta G_{\text{binding}}$  predictions are reported for Rosetta and SPaDES (**methods**) for 4 selected mutations described in **Figure 4**. Black text: specific interactions between water molecules and residues correspond to those highlighted in **Figure 4**. Red text: additional water-mediated interactions not displayed in **Figure 4**.  $\Delta\Delta G_{\text{binding}}$  is reported in kcal/mol for both predicted and experimental values. Predicted values in Rosetta Energy Units were translated into kcal/mol using the slope of the best linear correlation fit between predicted and experimental values. The number of hydrogen bonds for each water molecule highlighted in **Figure 4** is reported for the wild type and mutated binding interfaces. Numbers in parentheses correspond to strong hydrogen bonds with Energy < -0.5 REU.

| Colicin E2 immunity protein - Colicin E9 Dnase (S50A)                        |       |                               |       |                    |                             |       |                    |                      |                          |                    |                          |
|------------------------------------------------------------------------------|-------|-------------------------------|-------|--------------------|-----------------------------|-------|--------------------|----------------------|--------------------------|--------------------|--------------------------|
| $\Delta\Delta G_{\text{binding}}$ Summary                                    |       | Wildtype water hydrogen bonds |       |                    | Mutant water hydrogen bonds |       |                    | Wildtype hbond count |                          | Mutant hbond count |                          |
| $\Delta\Delta G_{\text{binding}}$ (kcal.mol <sup>-1</sup> .K <sup>-1</sup> ) |       | acceptor                      | donor | hbond energy (REU) | acceptor                    | donor | hbond energy (REU) | water molecule       | number of hydrogen bonds | water molecule     | number of hydrogen bonds |
| Experimental $\Delta\Delta G_{\text{binding}}$                               | 2.42  | wat1                          | S50   | -1.13              | wat2                        | S50A  | -1.16              | wat1                 | 3 (3)                    | wat1               | 2 (2)                    |
| SPaDES $\Delta\Delta G_{\text{binding}}$                                     | 2.63  | wat2                          | S50   | -0.99              | T87                         | wat1  | -1.44              | wat2                 | 3 (3)                    | wat2               | 3 (2)                    |
| Rosetta $\Delta\Delta G_{\text{binding}}$                                    | 1.01  | S50                           | wat2  | -1.32              | D51                         | wat1  | -1.41              |                      |                          |                    |                          |
| SPaDES standard error                                                        | 0.20  | T87                           | wat1  | -1.44              | Q92                         | wat2  | -0.95              |                      |                          |                    |                          |
| Rosetta standard error                                                       | 1.42  | D51                           | wat1  | -1.33              | E41                         | wat2  | -0.22              |                      |                          |                    |                          |
|                                                                              |       | Q92                           | wat2  | -1.26              |                             |       |                    |                      |                          |                    |                          |
| Barnase-Barstar (T42A)                                                       |       |                               |       |                    |                             |       |                    |                      |                          |                    |                          |
| $\Delta\Delta G_{\text{binding}}$ Summary                                    |       | Wildtype water hydrogen bonds |       |                    | Mutant water hydrogen bonds |       |                    | Wildtype hbond count |                          | Mutant hbond count |                          |
| $\Delta\Delta G_{\text{binding}}$ (kcal.mol <sup>-1</sup> .K <sup>-1</sup> ) |       | acceptor                      | donor | hbond energy (REU) | acceptor                    | donor | hbond energy (REU) | water molecule       | number of hydrogen bonds | water molecule     | number of hydrogen bonds |
| Experimental $\Delta\Delta G_{\text{binding}}$                               | 2.35  | T42                           | wat1  | -1.21              | D39                         | wat1  | -1.18              | wat1                 | 4 (4)                    | wat1               | 3 (3)                    |
| SPaDES $\Delta\Delta G_{\text{binding}}$                                     | 1.56  | wat1                          | R83   | -0.68              | wat2                        | wat1  | -0.55              | wat2                 | 4 (3)                    | wat2               | 4 (3)                    |
| Rosetta $\Delta\Delta G_{\text{binding}}$                                    | -0.37 | wat1                          | wat2  | -1.06              | wat3                        | wat1  | -1.05              | wat3                 | 4 (4)                    | wat3               | 4 (4)                    |
| SPaDES standard error                                                        | 0.79  | wat3                          | wat1  | -0.98              | wat3                        | wat2  | -0.79              |                      |                          |                    |                          |
| Rosetta standard error                                                       | 2.72  | wat3                          | wat2  | -0.59              | D39                         | wat3  | -1.18              |                      |                          |                    |                          |
|                                                                              |       | D39                           | wat3  | -1.47              | wat2                        | R83   | -0.38              |                      |                          |                    |                          |
|                                                                              |       | wat2                          | R83   | -0.08              | wat4                        | wat2  | -1.11              |                      |                          |                    |                          |
|                                                                              |       | wat2                          | wat4  | -0.57              | E73                         | wat3  | -1.12              |                      |                          |                    |                          |
|                                                                              |       | E73                           | wat3  | -1.29              |                             |       |                    |                      |                          |                    |                          |
| HyHEL-63 Fab-HEW Lysozyme (Y96A)                                             |       |                               |       |                    |                             |       |                    |                      |                          |                    |                          |
| $\Delta\Delta G_{\text{binding}}$ Summary                                    |       | Wildtype water hydrogen bonds |       |                    | Mutant water hydrogen bonds |       |                    | Wildtype hbond count |                          | Mutant hbond count |                          |
| $\Delta\Delta G_{\text{binding}}$ (kcal.mol <sup>-1</sup> .K <sup>-1</sup> ) |       | acceptor                      | donor | hbond energy (REU) | acceptor                    | donor | hbond energy (REU) | water molecule       | number of hydrogen bonds | water molecule     | number of hydrogen bonds |
| Experimental $\Delta\Delta G_{\text{binding}}$                               | 1.13  | wat1                          | Y96a  | -0.77              | S91                         | wat1  | -1.32              | wat1                 | 4 (4)                    | wat1               | 4 (3)                    |
| SPaDES $\Delta\Delta G_{\text{binding}}$                                     | 1.37  | wat1                          | R21   | -1.27              | wat2                        | wat1  | -0.80              | wat2                 | 4 (4)                    | wat2               | 3 (3)                    |
| Rosetta $\Delta\Delta G_{\text{binding}}$                                    | -2.70 | wat2                          | wat3  | -0.59              | W98                         | wat4  | -1.44              | wat3                 | 4 (4)                    | wat3               | --                       |
| SPaDES standard error                                                        | 0.24  | wat3                          | wat4  | -0.62              | wat4                        | wat5  | -1.09              | wat4                 | 3 (3)                    | wat4               | 3 (3)                    |
| Rosetta standard error                                                       | 3.84  | W98                           | wat4  | -1.39              | Y20                         | wat1  | -1.02              | wat5                 | 3 (3)                    | wat5               | 2 (2)                    |
|                                                                              |       | wat4                          | wat5  | -1.00              | wat2                        | S91   | -0.63              |                      |                          |                    |                          |
|                                                                              |       | S91                           | wat1  | -1.11              | Y50                         | wat2  | -1.31              |                      |                          |                    |                          |
|                                                                              |       | wat2                          | S91   | -0.59              | wat5                        | Q89   | -0.94              |                      |                          |                    |                          |
|                                                                              |       | Y20                           | wat1  | -1.08              | wat1                        | R21   | -0.41              |                      |                          |                    |                          |
|                                                                              |       | Y20                           | wat2  | -1.22              | Y47                         | wat4  | -1.23              |                      |                          |                    |                          |
|                                                                              |       | Y50                           | wat2  | -1.22              |                             |       |                    |                      |                          |                    |                          |
|                                                                              |       | Y50                           | wat3  | -1.13              |                             |       |                    |                      |                          |                    |                          |
|                                                                              |       | S91                           | wat3  | -1.20              |                             |       |                    |                      |                          |                    |                          |
|                                                                              |       | wat5                          | Q89   | -1.28              |                             |       |                    |                      |                          |                    |                          |
|                                                                              |       | wat6                          | wat5  | -0.51              |                             |       |                    |                      |                          |                    |                          |
| Barnase-Barstar (E73A)                                                       |       |                               |       |                    |                             |       |                    |                      |                          |                    |                          |
| $\Delta\Delta G_{\text{binding}}$ Summary                                    |       | Wildtype water hydrogen bonds |       |                    | Mutant water hydrogen bonds |       |                    | Wildtype hbond count |                          | Mutant hbond count |                          |
| $\Delta\Delta G_{\text{binding}}$ (kcal.mol <sup>-1</sup> .K <sup>-1</sup> ) |       | acceptor                      | donor | hbond energy (REU) | acceptor                    | donor | hbond energy (REU) | water molecule       | number of hydrogen bonds | water molecule     | number of hydrogen bonds |
| Experimental $\Delta\Delta G_{\text{binding}}$                               | 2.35  | E73                           | wat1  | -1.20              | wat1                        | wat6  | -0.73              | wat1                 | 3 (2)                    | wat1               | 3 (3)                    |
| SPaDES $\Delta\Delta G_{\text{binding}}$                                     | 1.56  | E73                           | wat2  | -1.26              | wat1                        | wat7  | -0.68              | wat2                 | 4 (3)                    | wat2               | 4 (3)                    |
| Rosetta $\Delta\Delta G_{\text{binding}}$                                    | -0.37 | wat3                          | R83   | -0.59              | wat2                        | wat6  | -1.08              | wat3                 | 5 (3)                    | wat3               | 3 (2)                    |
| SPaDES standard error                                                        | 0.79  | wat3                          | K27   | -0.95              | wat2                        | wat7  | -1.26              | wat4                 | 3 (1)                    | wat4               | 3 (3)                    |
| Rosetta standard error                                                       | 2.72  | wat2                          | K27   | -0.50              | wat4                        | wat8  | -0.54              | wat5                 | 3 (2)                    | wat5               | 4 (2)                    |
|                                                                              |       | wat4                          | D54   | -1.22              | wat8                        | wat3  | -0.82              |                      |                          | wat6               | 4 (4)                    |
|                                                                              |       | D75                           | wat5  | -1.10              | D39                         | wat3  | -1.04              |                      |                          | wat7               | 4 (4)                    |
|                                                                              |       | wat5                          | wat3  | -1.43              | wat7                        | Y103  | -0.72              |                      |                          | wat8               | 3 (3)                    |
|                                                                              |       | I55                           | wat2  | -1.29              | wat5                        | wat8  | -0.74              |                      |                          |                    |                          |
|                                                                              |       | wat1                          | wat9  | -0.71              | wat4                        | wat5  | -1.13              |                      |                          |                    |                          |
|                                                                              |       | Y103                          | wat1  | -0.16              | D54                         | wat4  | -1.44              |                      |                          |                    |                          |
|                                                                              |       | wat2                          | wat10 | -0.26              | I55                         | wat2  | -1.31              |                      |                          |                    |                          |
|                                                                              |       | E73                           | wat3  | -0.28              | wat6                        | K27   | -0.50              |                      |                          |                    |                          |
|                                                                              |       | D39                           | wat3  | -0.12              | wat6                        | wat7  | -0.78              |                      |                          |                    |                          |
|                                                                              |       | D54                           | wat4  | -0.25              | wat9                        | wat1  | -1.28              |                      |                          |                    |                          |
|                                                                              |       | wat4                          | G53   | -0.03              | wat10                       | wat2  | -0.19              |                      |                          |                    |                          |
|                                                                              |       | wat5                          | R83   | -0.12              | wat3                        | R83   | -0.44              |                      |                          |                    |                          |
|                                                                              |       |                               |       |                    | I51                         | wat5  | -0.33              |                      |                          |                    |                          |
|                                                                              |       |                               |       |                    | wat5                        | R83   | -0.26              |                      |                          |                    |                          |

**Table S5. Improved homology modeling of GPCRs using SPaDES compared to Rosetta, Related to Figure 5.** Sequence identity reported between selected GPCR target and homolog template for the entire TM region and for local regions around the buried TM cavities. Improved all-atom structure prediction (measured by fraction improved of GDC-all) and improved cavity geometry prediction (measured by fraction improved of recovered cavity points) of SPaDES versus Rosetta: The top performing of the 5 lowest energy structures and the standard error of mean (SEM) are provided. Standard error of mean is calculated from the 5 lowest energy models.

| Target PDB | Target                               | Template PDB | Template                             | Sequence of trans-membrane region | Sequence identity of residues around cavity (3A) | Sequence identity of residues around cavity (9A) | GDC-all of cav. res. (Frac. improved) | GDC-all of cav. res. improved (SEM) | Cavity point recovery (Frac. improved) | Cavity point recovery improved (SEM) |
|------------|--------------------------------------|--------------|--------------------------------------|-----------------------------------|--------------------------------------------------|--------------------------------------------------|---------------------------------------|-------------------------------------|----------------------------------------|--------------------------------------|
| 3PBL       | Dopamine D3 receptor                 | 4BVN         | Beta1-adenoceptor                    | 39                                | 50                                               | 41                                               | 0.054                                 | 0.019                               | 0.111                                  | 0.126                                |
| 4IAR       | Chimeric 5-HT1B-BRIL                 | 3RZE         | Histamine H1 receptor                | 37                                | 48                                               | 42                                               | 0.194                                 | 0.033                               | 0.101                                  | 0.106                                |
| 3PBL       | Dopamine D3 receptor                 | 2RH1         | Beta2-adenergetic receptor           | 36                                | 49                                               | 39                                               | 0.048                                 | 0.017                               | 0.395                                  | 0.115                                |
| 3PBL       | Dopamine D3 receptor                 | 5CXV         | M1 muscarinic acetylcholine receptor | 34                                | 43                                               | 37                                               | 0.402                                 | 0.024                               | 0.249                                  | 0.103                                |
| 4E1Y       | Chimeric A2a adenosine receptor      | 4BVN         | Beta1-adenoceptor                    | 33                                | 44                                               | 38                                               | -0.015                                | 0.023                               | 0.535                                  | 0.100                                |
| 3EML       | A2a adenosine receptor               | 2RH1         | Beta2-adenergetic receptor           | 33                                | 42                                               | 35                                               | 0.167                                 | 0.020                               | 0.192                                  | 0.087                                |
| 4E1Y       | Chimeric A2a adenosine receptor      | 2RH1         | Beta2-adenergetic receptor           | 33                                | 46                                               | 36                                               | 0.069                                 | 0.025                               | 0.050                                  | 0.131                                |
| 3PBL       | Dopamine D3 receptor                 | 5DSG         | M4 muscarinic acetylcholine receptor | 33                                | 43                                               | 36                                               | 0.214                                 | 0.044                               | 0.278                                  | 0.097                                |
| 2RH1       | Beta2-adenergetic receptor           | 3EML         | A2a adenosine receptor               | 32                                | 43                                               | 38                                               | -0.046                                | 0.019                               | 0.888                                  | 0.185                                |
| 5CXV       | M1 muscarinic acetylcholine receptor | 4BVN         | Beta1-adenoceptor                    | 30                                | 39                                               | 32                                               | 0.197                                 | 0.033                               | 0.073                                  | 0.122                                |
| 3PBL       | M4 muscarinic acetylcholine receptor | 4BVN         | Beta1-adenoceptor                    | 30                                | 39                                               | 29                                               | 0.091                                 | 0.021                               | 0.197                                  | 0.117                                |
| 3PBL       | Dopamine D3 receptor                 | 4S0V         | OX2 orexin receptor                  | 29                                | 40                                               | 30                                               | 0.265                                 | 0.025                               | 0.271                                  | 0.086                                |
| 3PBL       | Dopamine D3 receptor                 | 3EML         | A2a adenosine receptor               | 29                                | 39                                               | 34                                               | 0.381                                 | 0.036                               | 0.254                                  | 0.176                                |
| 3V2Y       | Sphingosine 1-phosphate receptor-1   | 5CXV         | M1 muscarinic acetylcholine receptor | 29                                | 35                                               | 29                                               | 0.461                                 | 0.048                               | 0.244                                  | 0.125                                |
| 3V2Y       | Sphingosine 1-phosphate receptor-1   | 5DSG         | M4 muscarinic acetylcholine receptor | 26                                | 31                                               | 29                                               | -0.122                                | 0.017                               | 0.275                                  | 0.140                                |
| 3PBL       | Dopamine D3 receptor                 | 3V2Y         | Sphingosine 1-phosphate receptor-1   | 25                                | 33                                               | 30                                               | 0.292                                 | 0.028                               | 0.345                                  | 0.196                                |
| 4S0V       | OX2 orexin receptor                  | 5DSG         | M4 muscarinic acetylcholine receptor | 22                                | 33                                               | 22                                               | 0.175                                 | 0.022                               | 0.352                                  | 0.092                                |
| 3VW7       | Protease-activated receptor 1        | 4S0V         | OX2 orexin receptor                  | 22                                | 31                                               | 25                                               | 0.199                                 | 0.050                               | 0.172                                  | 0.117                                |
| 3PBL       | Dopamine D3 receptor                 | 1U19         | Bovine rhodopsin                     | 20                                | 28                                               | 27                                               | 0.044                                 | 0.067                               | 0.009                                  | 0.139                                |
| 4XNV       | P2Y1 receptor                        | 5DSG         | M4 muscarinic acetylcholine receptor | 20                                | 31                                               | 25                                               | 0.000                                 | 0.067                               | 0.732                                  | 0.263                                |



**Table S6. Polar residues in representative GPCRs from class A, B, C, and F, Related to Figure 6.** Buried polar residues in the transmembrane region are listed for six representative GPCR receptors in class specific residue numbering. Bolded residues indicate amino-acids with side-chains interacting with buried *de novo* predicted explicit waters through hydrogen bonds.

| Class A: A2a receptor | Class B: CRF1 receptor | Class B: Glucagon receptor | Class C: mGlu1 receptor | Class C: mGlu5 receptor | Class F: SMO receptor |
|-----------------------|------------------------|----------------------------|-------------------------|-------------------------|-----------------------|
| Buried Polar Residue  | Buried Polar Residue   | Buried Polar Residue       | Buried Polar Residue    | Buried Polar Residue    | Buried Polar Residue  |
| Y1.35                 | N1.43                  | Y1.43                      | S1.40                   | T1.54                   | H1.33                 |
| E1.39                 | <b>H1.47</b>           | <b>Y1.47</b>               | <b>S1.47</b>            | S2.35                   | T1.43                 |
| <b>N1.50</b>          | <b>S1.50</b>           | S1.50                      | T1.54                   | Y2.50                   | T1.47                 |
| N2.40                 | R2.46                  | <b>N2.47</b>               | S2.35                   | <b>T2.53</b>            | <b>T1.50</b>          |
| <b>S2.45</b>          | N2.47                  | H2.50                      | Y2.50                   | Q3.32                   | T1.53                 |
| <b>S2.50</b>          | H2.55                  | S2.56                      | T2.55                   | <b>R3.33</b>            | N2.48                 |
| <b>T3.36</b>          | <b>R2.60</b>           | <b>K2.60</b>               | S3.28                   | S3.39                   | <b>S2.55</b>          |
| <b>Q3.37</b>          | <b>N2.61</b>           | D2.68                      | <b>Q3.32</b>            | S3.43                   | W2.58                 |
| S3.38                 | W2.64                  | <b>Q3.37</b>               | <b>R3.33</b>            | <b>Y3.44</b>            | Q2.61                 |
| <b>S3.39</b>          | Q2.68                  | Y3.38                      | <b>S3.39</b>            | S3.45                   | Y3.33                 |
| <b>S3.42</b>          | T2.70                  | N3.43                      | <b>S3.40</b>            | T3.49                   | Y3.34                 |
| D3.49                 | T3.33                  | <b>Y3.44</b>               | <b>Y3.44</b>            | K3.50                   | W3.42                 |
| W4.50                 | <b>Y3.36</b>           | W3.46                      | S3.45                   | T3.51                   | <b>T3.47</b>          |
| W4.53                 | <b>N3.37</b>           | <b>E3.50</b>               | T3.49                   | Q4.32                   | W3.50                 |
| <b>N5.42</b>          | Y3.38                  | Y4.45                      | K3.50                   | Q4.43                   | <b>H3.51</b>          |
| <b>Y5.58</b>          | <b>H3.40</b>           | W5.36                      | T3.51                   | N5.47                   | T4.49                 |
| S6.36                 | T3.42                  | R5.40                      | Q4.32                   | T5.55                   | T4.57                 |
| <b>W6.48</b>          | <b>N3.43</b>           | <b>N5.50</b>               | Q4.43                   | E6.35                   | T5.68                 |
| <b>H6.52</b>          | W3.46                  | R6.37                      | N5.47                   | T6.42                   | <b>T6.47</b>          |
| <b>N6.55</b>          | <b>E3.50</b>           | S6.41                      | T5.55                   | <b>T6.46</b>            | <b>H6.51</b>          |
| <b>Y7.36</b>          | W4.60                  | T6.42                      | E6.35                   | Y6.57                   | <b>E7.38</b>          |
| S7.42                 | K4.64                  | <b>S7.46</b>               | T6.42                   | S7.35                   | <b>N7.41</b>          |
| <b>H7.43</b>          | <b>D5.36</b>           | S7.47                      | T6.46                   | <b>S7.37</b>            | <b>T7.48</b>          |
| <b>N7.45</b>          | <b>Y5.39</b>           | <b>Q7.49</b>               | Y6.57                   | <b>S7.39</b>            | <b>S7.53</b>          |
| S7.46                 | <b>Q5.40</b>           | Y7.57                      | T7.31                   | K7.51                   | W7.55                 |
| <b>N7.49</b>          | N5.50                  |                            | T7.32                   |                         | <b>W7.57</b>          |
| <b>Y7.53</b>          | T6.42                  |                            | <b>S7.37</b>            |                         |                       |
|                       | <b>T6.52</b>           |                            | <b>S7.39</b>            |                         |                       |
|                       | <b>T6.53</b>           |                            | K7.51                   |                         |                       |
|                       | N7.42                  |                            |                         |                         |                       |
|                       | E7.46                  |                            |                         |                         |                       |
|                       | S7.47                  |                            |                         |                         |                       |
|                       | <b>Q7.49</b>           |                            |                         |                         |                       |
|                       | S7.54                  |                            |                         |                         |                       |

**Table S7. Data sets of protein-protein complex structures and mutations used for training and testing the hybrid energy function of SPaDES selected from SKEMPI, Related to STAR Methods text.**

| High-resolution hydrated set of protein-protein complex structures |                                 |                          |                                                                                                                                                                                                                |
|--------------------------------------------------------------------|---------------------------------|--------------------------|----------------------------------------------------------------------------------------------------------------------------------------------------------------------------------------------------------------|
| PDB                                                                | Protein 1                       | Protein 2                | Mutants considered for $\Delta\Delta G_{\text{binding}}$ predictions                                                                                                                                           |
| 1ACB                                                               | Bovine alpha-chymotrypsin       | Eglin C                  | I_L45D, I_L45G, I_L45S                                                                                                                                                                                         |
| 1BRS                                                               | Barnase                         | Barstar                  | A_E73A, A_E73C, A_E73F, A_E73Q, A_E73S, A_E73W, A_E73Y, A_H102A, A_H102D, A_H102G, A_K27A, A_R83Q, A_R87A, D_D35A, D_D39A, D_T42A, D_W38F, D_W44F                                                              |
| 1CSE                                                               | Subtilisin Carlsberg            | Eglin C                  | I_L45E, I_L45G, I_L45I, I_L45S                                                                                                                                                                                 |
| 1DQJ                                                               | HyHEL-63 Fab                    | HEW Lysozyme             | A_N31A, A_N32A, A_S91A, A_Y50A, A_Y96A, B_D32A, B_W98A, B_Y33A, C_D101A, C_K96A, C_K97A, C_N93A, C_S100A, C_Y20A                                                                                               |
| 1DVF                                                               | IgG1-kappa D1.3 Fv              | E5.2 Fv                  | A_Y32A, B_E98A, B_R99A, B_W52A, B_Y101F, B_Y32A, D_D52A, D_H33A, D_Y98A                                                                                                                                        |
| 1JTG                                                               | TEM-1 beta-lactamase            | BLIP                     | A_E104A, A_E110A, A_M129A, A_P107A, A_Q99A, A_R243A, A_S130A, A_S235A, A_V103A, A_V216A, A_Y105A, B_D49A, B_F142A, B_F36A, B_H148A, B_H41A, B_K74A, B_S113A, B_S71A, B_W112A, B_W162A, B_Y143A, B_Y50A, B_Y53A |
| 1TM1                                                               | Subtilisin BPN                  | Chymotrypsin inhibitor 2 | I_E60A, I_E60S, I_M59A, I_M59G, I_M59K, I_R67A, I_R67C, I_T58A, I_T58D                                                                                                                                         |
| 1XD3                                                               | UCH-L3                          | Ubiquitin                | B_H68N, B_I44A, B_K27A, B_K27R, B_L8A                                                                                                                                                                          |
| 2FTL                                                               | Bovine trypsin                  | BPTI                     | I_I18A, I_K15F, I_K15L, I_K15M, I_K15Q, I_K15S, I_K15W, I_K15Y                                                                                                                                                 |
| 2G2U                                                               | SHV-1 beta-lactamase            | BLIP                     | A_D104K, B_F142A, B_F36A, B_G141A, B_H148A, B_H41A, B_K74A, B_S113A, B_S39A, B_S71A, B_W112A, B_W150A, B_W162A, B_Y143A, B_Y50A, B_Y53A                                                                        |
| 2WPT                                                               | Colicin E2 immunity protein     | Colicin E9 Dnase         | A_D33A, A_S50A, B_F86A, B_N75A, B_S74A, B_S78A, B_S84A, B_T87A, B_V98A                                                                                                                                         |
| 3NPS                                                               | Membrane-type serine protease 1 | S4 Fab                   | A_H143A, A_Q221A                                                                                                                                                                                               |

| Low- and high-resolution set of protein-protein complex structures |                                                  |                                                  |                                                                                                                                                                                                                                                                                                                                                                                                                                                        |
|--------------------------------------------------------------------|--------------------------------------------------|--------------------------------------------------|--------------------------------------------------------------------------------------------------------------------------------------------------------------------------------------------------------------------------------------------------------------------------------------------------------------------------------------------------------------------------------------------------------------------------------------------------------|
| PDB                                                                | Protein 1                                        | Protein 2                                        | Mutants considered for $\Delta\Delta G_{\text{binding}}$ predictions                                                                                                                                                                                                                                                                                                                                                                                   |
| 1A22                                                               | Human growth hormone                             | hGH binding protein                              | A_C182A, A_E174A, A_F176A, A_F25A, A_H18A, A_H21A, A_I179A, A_K172A, A_L45A, A_N63A, A_P48A, A_P61A, A_R167A, A_R178A, A_S51A, A_S62A, A_T175A, A_Y164A, A_Y42A, B_C308A, B_C322A, B_D326A, B_D364A, B_I303A, B_I305A, B_I365A, B_K321A, B_N418A, B_P306A, B_Q416A, B_R243A, B_R270A, B_R271A, B_R417A, B_S302A, B_S324A, B_S419A, B_T301A, B_V371A, B_W276A, B_W304F                                                                                  |
| 1A4Y                                                               | Ribonuclease inhibitor                           | Angiogenin                                       | A_D435A, A_E344A, A_E401A, A_I459A, A_K320A, A_S289A, A_W261A, A_W263A, A_W318A, A_W375A, A_Y434A, A_Y434F, B_E108A, B_H114A, B_H13A, B_H84A, B_K40Q, B_Q12A, B_R31A, B_R5A                                                                                                                                                                                                                                                                            |
| 1ACB<br>1AK4                                                       | Bovine alpha-chymotrypsin<br>Cyclophilin A       | Eglin C<br>HIV-1 capsid protein                  | I_L45D, I_L45G, I_L45S<br>D_A488G, D_A492G, D_A492V, D_G489A, D_P490A, D_V486A<br>A_E73A, A_E73C, A_E73F, A_E73Q, A_E73S, A_E73W, A_E73Y, A_H102A, A_H102D, A_H102G, A_K27A, A_N58A, A_R59A, A_R59K, A_R83Q, A_R87A, D_D35A, D_D39A, D_T42A, D_W38F, D_W44F, I_G12A, I_G37A, I_I18A, I_K15A, I_K15E, I_K15F, I_K15G, I_K15H, I_K15M, I_K15N, I_K15Q, I_K15R, I_K15S, I_K15T, I_K15Y, I_P13A, I_R17A, I_T11A                                            |
| 1CBW                                                               | Bovine alpha-chymotrypsin                        | BPTI                                             | I_L45E, I_L45G, I_L45I, I_L45S                                                                                                                                                                                                                                                                                                                                                                                                                         |
| 1CSE                                                               | Subtilisin Carlsberg                             | Eglin C                                          | H_M164A, T_D58A, T_D61A, T_F50A, T_F76A, T_G43A, T_I22A, T_I63A, T_K20A, T_K20R, T_K46A, T_K48A, T_L72A, T_N18A, T_Q37A, T_S16A, T_S47A, T_T17A, T_T21A, T_T60A, T_V64A, T_W14F, T_W45A, T_W45F, U_F140A, U_F147A, U_L133A, U_Q110A, U_T106A, U_T132A, U_V146A, U_V207A, U_W158F, U_Y156L, U_Y94A                                                                                                                                                      |
| 1DAN                                                               | Factor VIIa                                      | Tissue factor                                    | A_N31A, A_N32A, A_S91A, A_Y50A, A_Y96A, B_D32A, B_W98A, B_Y33A, B_Y50A, B_Y53A, C_D101A, C_K96A, C_K97A, C_L75A, C_N93A, C_R21A, C_S100A, C_T89A, C_W63A, C_Y20A                                                                                                                                                                                                                                                                                       |
| 1DQJ                                                               | HyHEL-63 Fab                                     | HEW Lysozyme                                     | A_S93A, A_W92A, A_Y32A, A_Y49A, B_D58A, B_E98A, B_N56A, B_R99A, B_W52A, B_Y101F, B_Y32A, C_Y49A, D_D52A, D_H33A, D_I97A, D_Q100A, D_R100bA, D_Y98A                                                                                                                                                                                                                                                                                                     |
| 1DVF                                                               | IgG1-kappa D1.3 Fv                               | E5.2 Fv                                          | A_F60eA, A_F94A, A_H143A, A_I41A, A_Q38A, A_Y60gA                                                                                                                                                                                                                                                                                                                                                                                                      |
| 1EAW                                                               | Membrane-type serine protease 1                  | BPTI                                             | A_C23A, A_D51A, A_E41A, A_G49A, A_H46A, A_I53A, A_L33A, A_S48A, A_S50A, A_T27A, A_V34A, A_V37A, A_Y54A, B_F86A, B_K97A, B_N72A, B_N75A, B_R54A, B_S74A, B_S77A, B_S78A, B_S84A, B_T87A, B_V98A                                                                                                                                                                                                                                                         |
| 1EMV                                                               | Colicin E9 immunity protein                      | Colicin E9 DNase                                 | C_K28A, C_K31A, C_N35A, C_T25A, C_W43A<br>A_Y106W, B_E171A, B_E178A, B_F214A, B_I216A<br>C_E85A, C_H27A, C_K29A, C_K35A, C_K46A, C_L44A, C_N52A, C_Q25A, C_Q40A, C_R59A, C_S42A, C_T45A                                                                                                                                                                                                                                                                |
| 1FCC<br>1FFW                                                       | IgG1 MO61 Fc<br>Chemotaxis protein CheY          | B domain of Protein G<br>Chemotaxis protein CheA | C_A632G, C_P595A, C_P608A, C_P609A, C_P657A                                                                                                                                                                                                                                                                                                                                                                                                            |
| 1GC1                                                               | HIV-1 gp120                                      | CD4                                              | B_L103A, B_N104A, B_Q67A, B_V4A<br>A_E9Q, A_F82A, A_F82D, A_I5A, A_K12E, A_K12S, A_K84A, A_K84D, A_N89A, A_Q78A, A_Q78E, A_R85E, A_R88A, A_R88Q, A_T13A, A_T13D, A_T6A, A_T6D, A_W91A, A_W91D                                                                                                                                                                                                                                                          |
| 1GCQ                                                               | Growth factor receptor-bound protein 2           | VavS                                             | B_K103A, B_N60A, B_T20A, B_V91A, B_Y26A, B_Y90A                                                                                                                                                                                                                                                                                                                                                                                                        |
| 1H9D                                                               | AML1 Runx1 Runt domain                           | Core-binding factor beta                         | H_H100A, H_W52A, H_W53A, H_Y58A, L_D28A, L_S93A, L_T94A, L_W92A, L_W96A, L_Y30A, L_Y91A, I_G50A, I_K47A, I_K47M, I_N48A, I_N53A, I_R84A, I_S54A, I_V51A, I_W56F, I_W56Y, I_W82A, I_W82F, I_W82Y, I_Y49A, I_Y49F                                                                                                                                                                                                                                        |
| 1IAR                                                               | Interleukin-4                                    | Interleukin-4 receptor                           | A_E104A, A_E110A, A_M129A, A_P107A, A_Q99A, A_R243A, A_S130A, A_S235A, A_V103A, A_V216A, A_Y105A, B_D49A, B_F142A, B_F36A, B_H148A, B_H41A, B_K74A, B_S113A, B_S71A, B_W112A, B_W150A, B_W162A, B_Y143A, B_Y50A, B_Y53A                                                                                                                                                                                                                                |
| 1JCK                                                               | Beta-chain of 14.3.3                             | Staphylococcal enterotoxin C3                    | A_V92I, B_E119A, B_E119Q, B_F30A, B_I50A, B_I53A, B_L27A, B_S52A, B_T51A, B_V77A                                                                                                                                                                                                                                                                                                                                                                       |
| 1JRH                                                               | mAbs A6                                          | Interferon gamma receptor                        | A_D74N, A_F297I, A_F297Y, A_Y72N<br>H_D56E, H_D56N, H_Y100aF, L_L94V, L_Y32F<br>I_E60A, I_E60S, I_M59A, I_M59G, I_M59K, I_R65A, I_R67A, I_R67C, I_T58A, I_T58D, I_Y61A, I_Y61G                                                                                                                                                                                                                                                                         |
| 1JTG                                                               | IgG1-kappa D1.3 Fv                               | E5.2 Fv                                          | A_H30A, A_W92A, A_Y32A, A_Y49A, A_Y50A, B_D100A, B_W52A, B_Y32A, C_D18A, C_I124A, C_K116A, C_N19A, C_Q121A, C_S24A, C_T118A, C_V120A                                                                                                                                                                                                                                                                                                                   |
| 1KTZ                                                               | Transforming growth factor beta 3                | TGF-beta type II receptor                        | B_H68N, B_I44A, B_K27A, B_K27R, B_L8A<br>W_D435A, W_E344A, W_I459A, W_K320A, W_S289A, W_W261A, W_W263A, W_W318A, W_W375A, W_Y434A, W_Y434F, W_Y437A, I_I18A, I_K15F, I_K15L, I_K15M, I_K15Q, I_K15S, I_K15W, I_K15Y                                                                                                                                                                                                                                    |
| 1MAH<br>1NMB                                                       | Acetylcholinesterase<br>Subtype N9 neuraminidase | Fasciculin<br>Antibody NC10                      | A_D104K, B_F142A, B_F36A, B_G141A, B_H148A, B_H41A, B_K74A, B_S113A, B_S39A, B_S71A, B_W112A, B_W150A, B_W162A, B_Y143A, B_Y50A, B_Y51A, B_Y53A                                                                                                                                                                                                                                                                                                        |
| 1TM1                                                               | Subtilisin BPN                                   | Chymotrypsin inhibitor 2                         | D_C70S, D_S68A, D_S68E, D_T2A, D_T2R, D_T2S, D_V69I, D_V69T                                                                                                                                                                                                                                                                                                                                                                                            |
| 1VFB                                                               | IgG1-kappa D1.3 Fv                               | HEW Lysozyme                                     | I_M73A, I_M73G                                                                                                                                                                                                                                                                                                                                                                                                                                         |
| 1XD3                                                               | UCH-L3                                           | Ubiquitin                                        | D_Q34A, D_S31A, D_S32A, E_D32A, E_D56A, E_I53L, E_I53V, E_Q58A, E_Q58E, E_S99A, E_Y101A                                                                                                                                                                                                                                                                                                                                                                |
| 1Z7X                                                               | Ribonuclease inhibitor                           | RNase A                                          | A_D33A, A_E41A, A_N34A, A_P56A, A_S50A, A_V37A, B_F86A, B_K97A, B_N72A, B_N75A, B_Q92A, B_R54A, B_S74A, B_S77A, B_S78A, B_S84A, B_T87A, B_V98A                                                                                                                                                                                                                                                                                                         |
| 2FTL                                                               | Bovine trypsin                                   | BPTI                                             | C_I18A, C_I21A, C_I21R, C_I27A, C_I27R                                                                                                                                                                                                                                                                                                                                                                                                                 |
| 2G2U                                                               | SHV-1 beta-lactamase                             | BLIP                                             | B_D217A, B_F94A, B_H143A, B_I41A, B_I60A, B_K224A, B_N95A, B_Q175A, B_T98A                                                                                                                                                                                                                                                                                                                                                                             |
| 2J0T                                                               | MMP1 Interstitial collagenase                    | Metalloproteinase inhibitor 1                    | H_D32A, H_D32N, H_S31A, H_W98A, H_W98F, H_Y33A, H_Y33F, H_Y33L, H_Y50A, H_Y50L, H_Y53A, H_Y53F, H_Y53L, H_Y53W, H_Y58A, H_Y58F, H_Y58L, L_N31A, L_N31D, L_N31E, L_N32A, L_Q53A, L_Y50A, L_Y50L, L_Y96A, Y_D101A, Y_D101E, Y_D101G, Y_D101N, Y_D101Q, Y_D101R, Y_D101S, Y_H15A, Y_I98A, Y_K96A, Y_K97A, Y_K97E, Y_K97M, Y_L75A, Y_N93A, Y_R21A, Y_R21E, Y_R21G, Y_R21H, Y_R21K, Y_R21M, Y_R21N, Y_R21Q, Y_R21W, Y_S100A, Y_W63A, Y_Y20A, Y_Y20F, Y_Y20L |
| 2SIC                                                               | Subtilisin BPN                                   | Streptomyces subtilisin inhibitor                | A_F97A, A_H143A, A_I41A, A_Q175A, A_Q221A, A_Y146A                                                                                                                                                                                                                                                                                                                                                                                                     |
| 2VLJ                                                               | HL-A2-flu                                        | JM22                                             | I_P36G, I_L36A, I_V38G, I_V38L, I_Y37F, I_Y37G                                                                                                                                                                                                                                                                                                                                                                                                         |
| 2WPT                                                               | Colicin E2 immunity protein                      | Colicin E9 DNase                                 |                                                                                                                                                                                                                                                                                                                                                                                                                                                        |
| 3BK3                                                               | Bone morphogenetic protein-2                     | Crossveinless 2                                  |                                                                                                                                                                                                                                                                                                                                                                                                                                                        |
| 3BN9                                                               | Membrane-type serine protease 1                  | E2 Fab                                           |                                                                                                                                                                                                                                                                                                                                                                                                                                                        |
| 3HFM                                                               | HyHEL-10                                         | HEW Lysozyme                                     |                                                                                                                                                                                                                                                                                                                                                                                                                                                        |
| 3NPS                                                               | Membrane-type serine protease 1                  | S4 Fab                                           |                                                                                                                                                                                                                                                                                                                                                                                                                                                        |
| 4CPA                                                               | Carboxypeptidase A                               | Potato carboxypeptidase inhibitor                |                                                                                                                                                                                                                                                                                                                                                                                                                                                        |
